# Supplementary material for: A sensitive and noninvasive cyclic peptide-based electrogenerated chemiluminescence biosensing method for the determination of sweat glucose
Source: Royal Society of Chemistry journal article supplement (doi:10.1039/d3cc02549g), 2023-01-01
Supplement: d3cc02549g1.pdf [file d3cc02549g1.pdf]

## Supporting Information

### **Sensitive and noninvasive cyclic peptide-based electrogenerated chemiluminescence biosensing method for the determination of sweat glucose**

Hong Huang, Manping Qian, Qiang Gao, Chengxiao Zhang and Honglan Qi\*

Key Laboratory of Analytical Chemistry for Life Science of Shaanxi Province, School  
of Chemistry and Chemical Engineering, Shaanxi Normal University, Xi'an, 710119,

P. R. China

\*Corresponding author. Tel.: +86-29-81530726; Fax: +86-29-81530727.

E-mail: honglanqi@snnu.edu.cn.

## Table of Contents

1. Experimental section
2.  $^1\text{H}$  NMR spectrum of  $[\text{Ir}(\text{ppy})_2(\text{CH}_3\text{CN})\text{Cl}]$  (Fig. S1)
3. Mass spectrum of  $[\text{Ir}(\text{ppy})_2(\text{CH}_3\text{CN})]^+$  (Fig. S2)
4. Cyclic voltammograms and electrochemical impedance spectra (Fig. S3)
5. ECL stability of Ir1-CP1/AuNPs/Nafion/GCE (Fig. S4)
6. ECL intensity vs. potential profiles of different electrodes (Fig. S5)
7. Effect of self-assembly time on the ECL intensity (Fig. S6)
8. Effect of incubation time on the increased ECL intensity (Fig. S7)
9. Characterization of Ir1-CP2 (Fig. S8)
10. Calibration curves (Fig. S9)
11. Sweat sample analysis (Fig. 10)
12. Comparison of different reported methods for glucose (Table S1)
13. Recovery of glucose in 10-fold diluted artificial sweat sample (Table S2)
14. Recovery of glucose in 500-fold diluted human sweat sample (Table S3)
15. References

## 1. Experiment

### 1.1 Reagents and apparatus

The cyclic peptides, including cyclo-[-CNDNHCRDNDNC-] (MW = 1306.33 g/mol, CP1), cyclo-[-CHNDNHCHDNDHC-] (MW = 1561.58 g/mol, CP2) were chemically synthesized by Shanghai Apeptide Co., Ltd. (China). 6-Mercapto-1-hexanol (MCH), Nafion (5 wt%) and CH<sub>3</sub>CN were obtained from Sigma-Aldrich (USA). Ascorbic acid (AA), uric acid (UA) and lactic acid (LA) were obtained from Wokai Chemical Reagent Co., Ltd (China). Fructose, sucrose, maltose, lactose and tri-n-propylamine (TPA, 98%) were supplied by Sinopharm Chemical Reagent Co., Ltd. (China). Millipore Milli-Q water (18.2 MΩ•cm) was used in all experiments.

CHI 660 electrochemical workstation (Chenhua Instruments Co., China), MPI-E ECL detector (Xi'an Remax Analysis Instruments Co., Ltd, China), UV-Vis spectrophotometer (UV-2450, Shimadzu Corporation, Japan), nuclear magnetic resonance spectrometer (Bruker Advance III 400 spectrometry, Germany), electrospray ionization mass spectrometer (ESI-MS, Bruker Maxis UHR-TOF, Germany), and fluorolog-3 fluorescence spectrophotometer (Horiba JY, USA) were used in this work.

### 1.2 Synthesis of [Ir(ppy)<sub>2</sub>(CH<sub>3</sub>CN)Cl] and ECL probe

An Ir(III) solvent complex ([Ir(ppy)<sub>2</sub>(CH<sub>3</sub>CN)Cl], Ir1-CH<sub>3</sub>CN) was synthesized and used as ECL signal precursor according to references<sup>1</sup> and our previous work<sup>2</sup> except CH<sub>3</sub>CN used as solvent. Firstly, chloro-bridged Ir(III) dimer [Ir(ppy)<sub>2</sub>(μ-Cl)]<sub>2</sub> was synthesized according to the reference.<sup>3</sup> In brief, IrCl<sub>3</sub>•3H<sub>2</sub>O (353 mg, 1.0 mmol) and 2-phenylpyridine (ppy) (341 mg, 2.2 mmol) were carefully added into 40 mL of the mixture of 2-ethoxyethanol/H<sub>2</sub>O (v:v = 3:1) solvent. The mixture was refluxed at 120 °C for 24 h under N<sub>2</sub> atmosphere. On cooling, the precipitate was deposited, which was collected by filtration, and washed three times with water, ethanol and n-hexane. After that, the crude product was further purified by recrystallizing with CH<sub>3</sub>OH and CH<sub>2</sub>Cl<sub>2</sub>. Yellow product was obtained and dried in an oven at 40 °C overnight. Secondly, [Ir(ppy)<sub>2</sub>(μ-Cl)]<sub>2</sub> (5.0 mg) was dissolved in 20 mL of CH<sub>3</sub>CN and the mixture was stirred for 30 min at room temperature. After that, a yellow solid [Ir(ppy)<sub>2</sub>(CH<sub>3</sub>CN)Cl] was obtained.

[Ir(ppy)<sub>2</sub>(CH<sub>3</sub>CN)Cl] <sup>1</sup>H NMR (400 MHz, CD<sub>2</sub>Cl<sub>2</sub>-d<sub>2</sub>) δ 9.25 (2H, d, *J* = 5.4 Hz), 7.94 (2H, d, *J* = 8.1 Hz), 7.80 (2H, t, *J* = 7.9 Hz), 7.56 (2H, d, *J* = 7.9 Hz), 6.82 (4H, q,

$J = 6.8$  Hz), 6.60 (2H, t,  $J = 7.5$  Hz), 5.87 (2H, d,  $J = 7.8$  Hz), 1.97 (3H, s). ESI-MS (m/z): calculated for  $[\text{C}_{24}\text{H}_{19}\text{IrN}_3]^+ [\text{M}]^+$ : 542.1204; found: 542.1210.

The ECL probe in this work was prepared by chemically conjugating the Ir1-CH<sub>3</sub>CN onto the cyclic peptide by coordination interaction via His within the cyclic peptide. In detail, 200  $\mu\text{L}$  of 1 mM  $[\text{Ir}(\text{ppy})_2(\text{CH}_3\text{CN})\text{Cl}]$  in CH<sub>3</sub>CN was mixed with 800  $\mu\text{L}$  of 12.5  $\mu\text{M}$  cyclic peptide in 10 mM PB (phosphate buffer, pH 7.4, 0.0018 M NaH<sub>2</sub>PO<sub>4</sub> and 0.0082 M Na<sub>2</sub>HPO<sub>4</sub>) for 2 h at room temperature.

### 1.3 Fabrication of ECL biosensor

Prior to its use, the glassy carbon electrode (GCE, 2.0 mm diameter) was carefully polished with 0.3 and 0.05  $\mu\text{m}$  Al<sub>2</sub>O<sub>3</sub> powder on fine polishing paper and then ultrasonically cleaned in water and ethanol.

Gold nanoparticles (AuNPs) with a diameter of  $\sim 12$  nm were prepared by citrate reduction of HAuCl<sub>4</sub> in aqueous solution. In brief, 100 mL of 0.01% HAuCl<sub>4</sub> was brought to reflux, and then, 4 mL of 1% sodium citrate was introduced while stirring. The gold nanoparticles suspension was then kept boiling for another 30 min and left to cool to room temperature.

The mixture of AuNPs/Nafion was prepared by mixing 0.5% Nafion and AuNPs (v:v = 1:2) and sonicating for 30 min. Then, 10  $\mu\text{L}$  of this mixture was dropped onto the surface of the cleaned GCE and allowed to dry to obtain AuNPs/Nafion/GCE. The AuNPs/Nafion/GCE was immersed in 100  $\mu\text{L}$  Ir1-CP1 for 4 h and then into 100  $\mu\text{L}$  of 1.0 mM MCH for 30 min. In each step, the electrodes were washed with 10 mM PB (pH 7.4). The obtained form Ir1-CP1/AuNPs/Nafion/GCE was used as ECL biosensor.

### 1.4 ECL measurement

A three-electrode system with modified GCE, a platinum counter electrode, an Ag/AgCl reference electrode (saturated KCl) was used. The prepared Ir1-CP/AuNPs/Nafion/GCE was dipped into glucose solution with different concentrations for 30 min. ECL measurement was performed in 1.0 mL of 0.1 M phosphate buffer solution (PBS, 0.018 M NaH<sub>2</sub>PO<sub>4</sub>, 0.082 M Na<sub>2</sub>HPO<sub>4</sub>, and 0.1 M KCl, pH 7.4) containing 50 mM TPA under triangular potential scan at 0.1 V/s unless otherwise stated. The voltage of the photomultiplier tube (PMT) was set to -900 V. The decrease peak of ECL intensity at 1.15 V ( $\Delta I = I_0 - I_s$ ) was used as analytical signal for the determination of glucose, in which  $I_0$  and  $I_s$  was the ECL intensity in the absence and presence of glucose, respectively.

## 2. Results

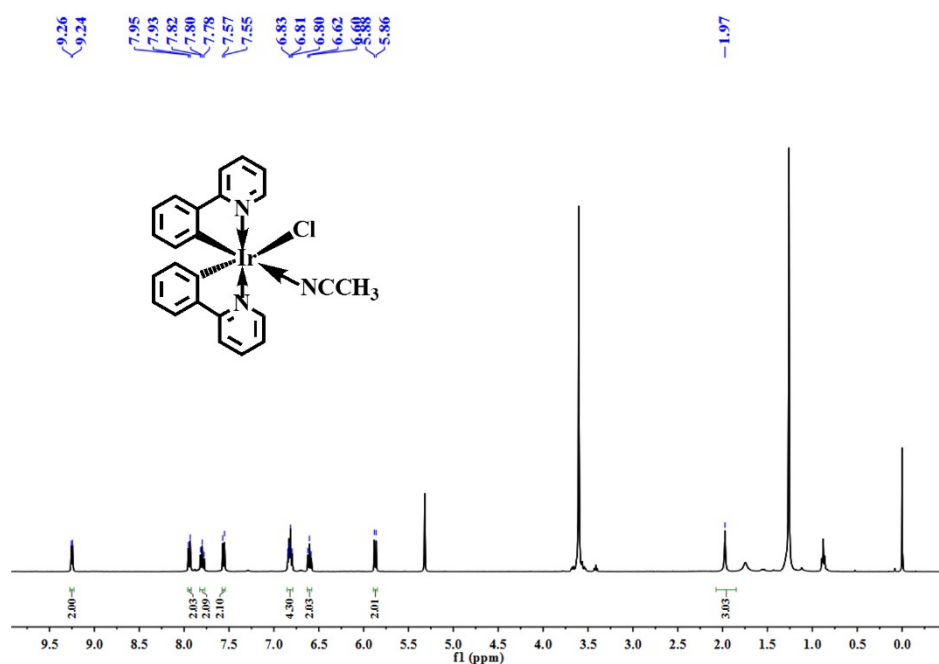

**Fig. S1**  $^1\text{H}$  NMR spectrum of  $[\text{Ir}(\text{ppy})_2(\text{CH}_3\text{CN})\text{Cl}]$  in  $\text{CD}_2\text{Cl}_2\text{-}d_2$ . (400 MHz)

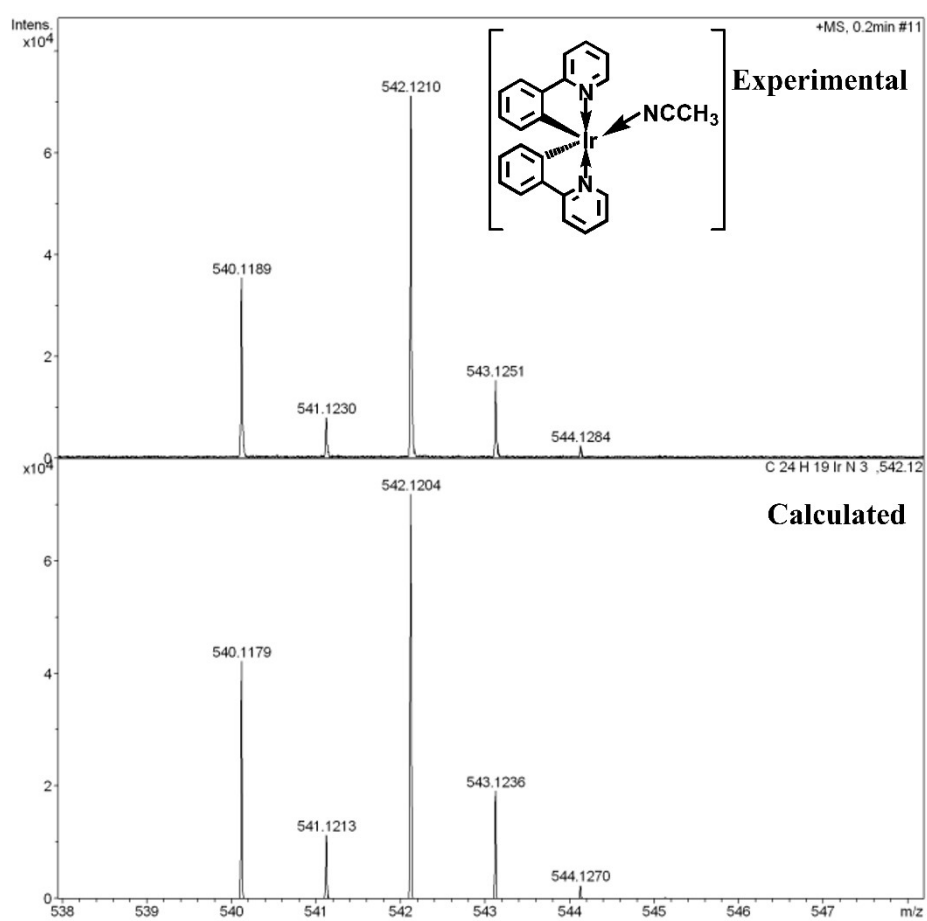

**Fig. S2** Mass spectrum of  $[\text{Ir}(\text{ppy})_2(\text{CH}_3\text{CN})]^+$  in methanol.  $[\text{M}]^+$  542.1210 (calculated, 542.1204)

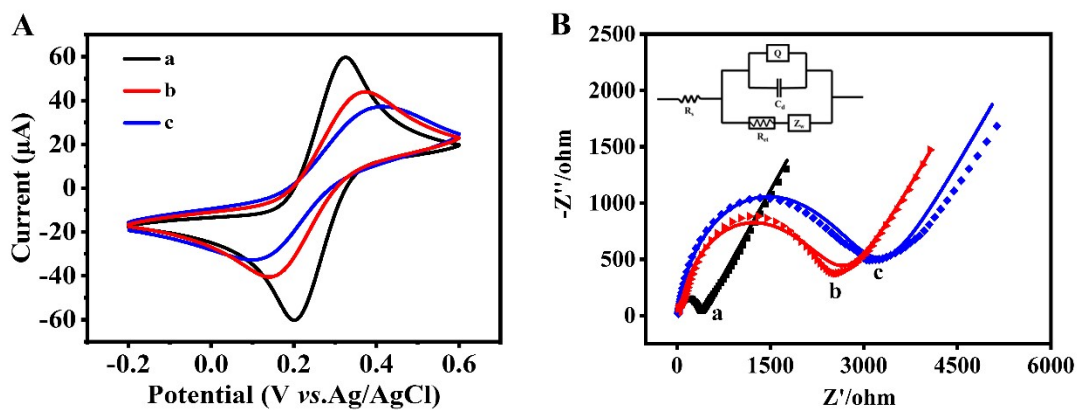

**Fig. S3** (A) Cyclic voltammograms and (B) experimental (line) and simulating (dot) Nyquist plots of electrochemical impedance spectra obtained at (a) bare GCE, (b) AuNPs/Nafion/GCE and (c) Ir1-CP1/AuNPs/Nafion/GCE. The measurement conditions: 0.1 M PBS (pH 7.4) containing 5 mM  $K_3[Fe(CN)_6]$ , 5 mM  $K_4[Fe(CN)_6]$  (A) Scan rate, 100 mV/s. (B) The biased potential of 0.22 V, the frequency from 100 kHz to 0.1 Hz, and the amplitude of 5.0 mV.

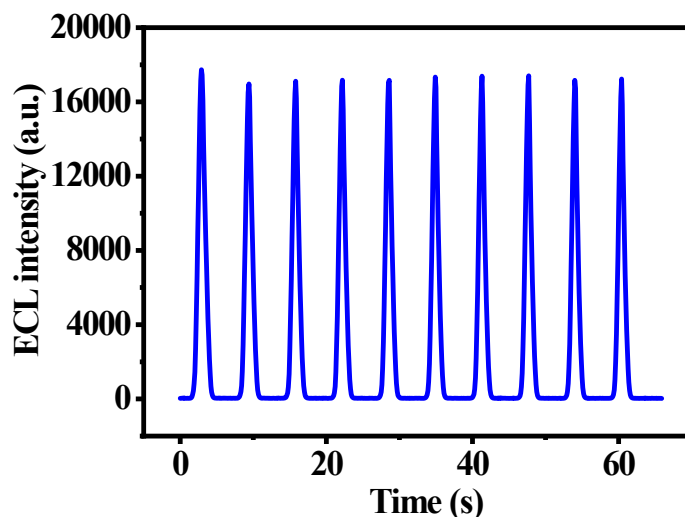

**Fig. S4** Representative ECL signals of Ir1-CP1/AuNPs/Nafion/GCE obtained in 0.1 M PBS (pH 7.4) containing 50 mM TPA from continuous potential scanning over ten cycles between 0 and +1.6 V vs. Ag/AgCl with scan rate of 0.5 V/s.

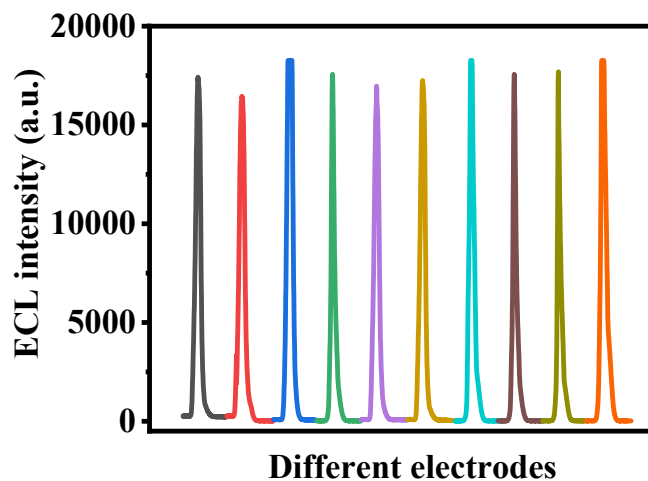

**Fig. S5** ECL signals obtained in 0.1 M PBS (pH 7.4) containing 50 mM TPA from ten modified electrodes (Ir1-CP1/AuNPs/Nafion/GCE) by potential scanning over one cycle between 0 and + 1.6 V vs. Ag/AgCl with a scan rate of 0.1 V/s.

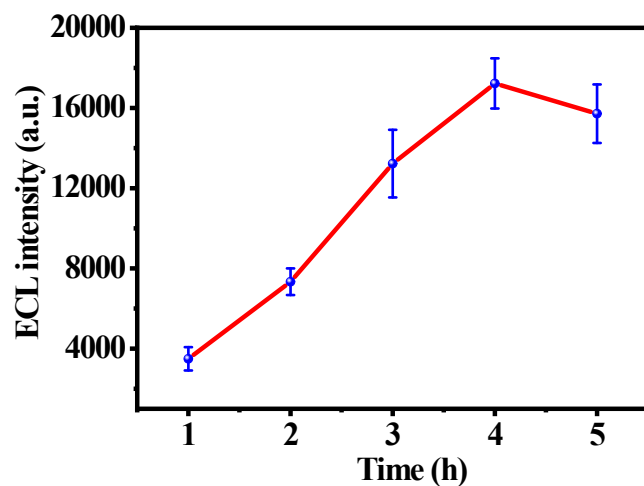

**Fig. S6** Effect of self-assembly time of Ir1-CP1 on the ECL intensity of the obtained Ir1-CP1/AuNPs/Nafion/GCE.

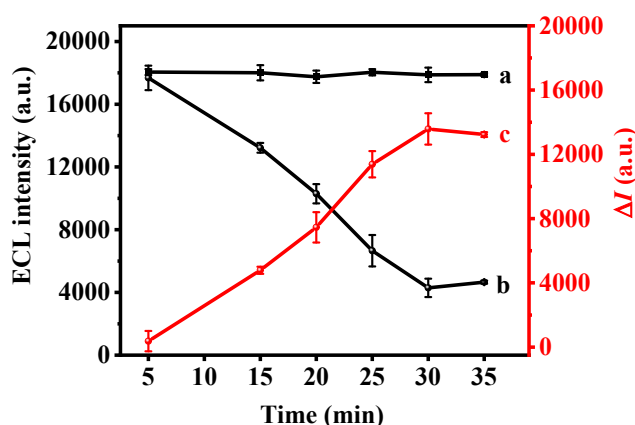

**Fig. S7** Optimization of incubation time for 10 mM glucose. ECL intensity of Ir1-CP1/AuNPs/Nafion/GCE in the absence of glucose ( $I_0$ , a) and in the presence of glucose ( $I_s$ , b),  $\Delta I = I_0 - I_s$  (c).

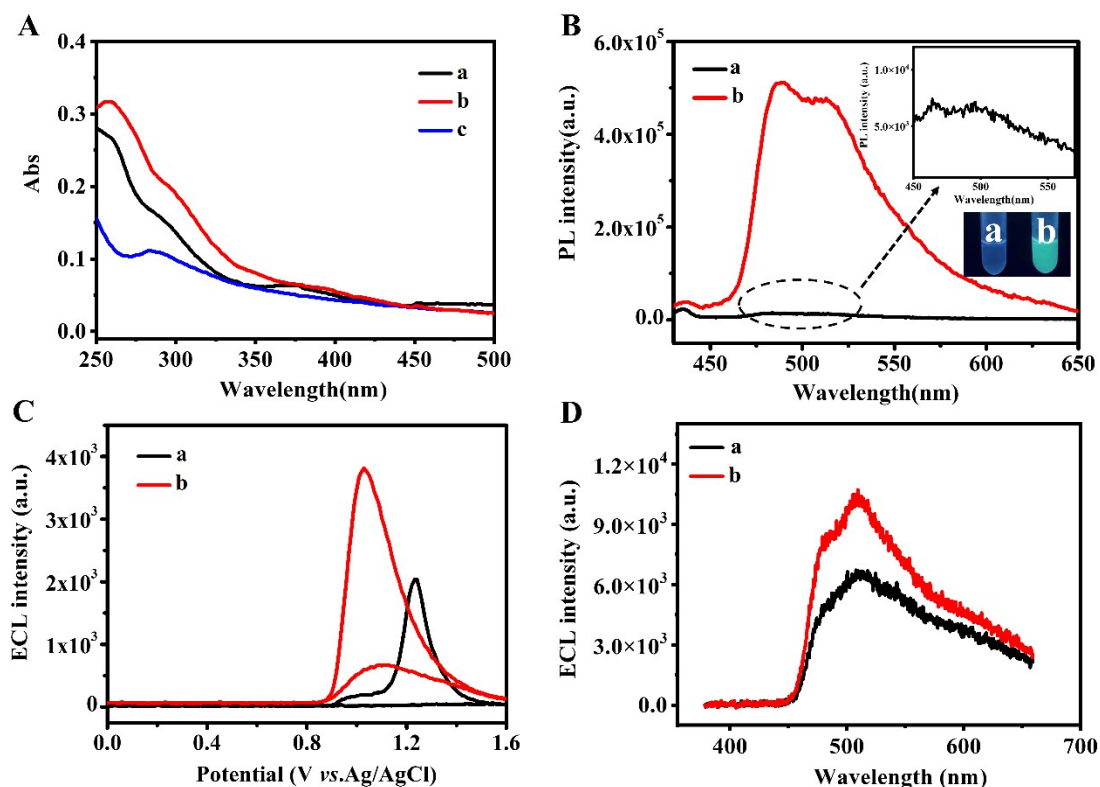

**Fig. S8** UV-Vis absorption spectra (A) and PL spectra (B) of 5  $\mu\text{M}$  Ir1-CH<sub>3</sub>CN (a), 5  $\mu\text{M}$  Ir1-CH<sub>3</sub>CN-50  $\mu\text{M}$  CP2 (b) and 50  $\mu\text{M}$  CP2 (c) in 10 mM PB (pH=7.4).  $\lambda_{\text{ex}} = 380$  nm. Insert, relative photographs under 365 nm irradiation. (C) ECL intensity vs. potential profiles of 1  $\mu\text{M}$  Ir1-CH<sub>3</sub>CN in the absence (a) and presence (b) of 10  $\mu\text{M}$  CP2 in 0.1 M PBS (pH 7.4) containing 50 mM TPA. PMT: -900 V. Scan rate, 0.1 V/s. (D) ECL spectra of 10  $\mu\text{M}$  Ir1-CH<sub>3</sub>CN without (a) or 1  $\mu\text{M}$  CP2 (b). ECL measurement



conditions: 0.1 M PBS (pH 7.4) containing 50 mM TPA by pulsing between 0 V and + 1.28 V (a), or pulsing between 0 V and + 1.18 V (b).

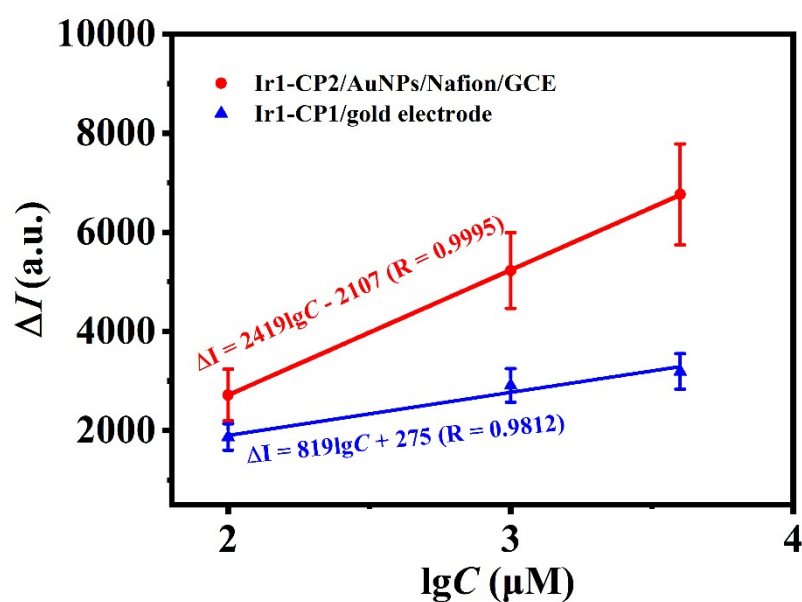

**Fig. S9** Comparison of ECL response to glucose at Ir1-CP2/AuNPs/Nafion/GCE and Ir1-CP1/gold electrode.

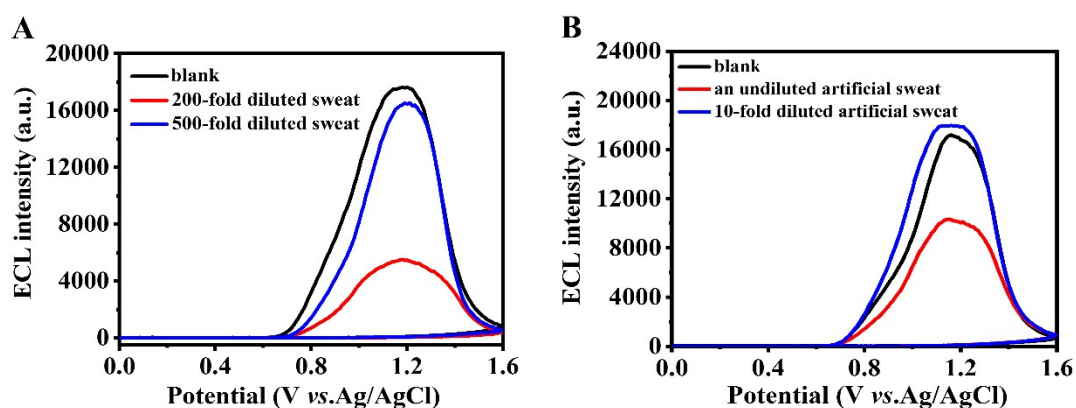

**Fig. S10** ECL intensity vs. potential profiles of the ECL biosensor after incubation in different media. (A) (a) blank, (b) 200-fold diluted sweat, (c) 500-fold diluted sweat. (B) (a) blank, (b) undiluted artificial sweat, (c) 10-fold diluted artificial sweat.

**Table S1** Analytical performance of glucose in references and in this work.

| Analytical method | Linear range       | Detection limit | Sample        | Ref.      |
|-------------------|--------------------|-----------------|---------------|-----------|
| Fluorescence      | 0.05-5 mM          | 50 $\mu$ M      | intracellular | 4         |
| Electrochemistry  | 20.0-400.0 $\mu$ M | 200 $\mu$ M     | human serum   | 5         |
| Electrochemistry  | 0-100 $\mu$ M      | 300 nM          | sweat         | 6         |
| Electrochemistry  | 1-111 mM           | 32.4 $\mu$ M    | blood         | 7         |
| Electrochemistry  | 0.08-30 mM         | 27 $\mu$ M      | human serum   | 8         |
| ECL               | 20 nM-12 mM        | 1.2 nM          | sweat         | 9         |
| ECL               | 5-80 $\mu$ M       | 0.6 $\mu$ M     | human serum   | 10        |
| ECL               | 0.1 mM-10 mM       | 70 $\mu$ M      | sweat         | This work |

**Table S2** Recovery of glucose in 10-fold diluted artificial sweat sample.

| Samples | Added (mM) | Found (mM) | Recovery (%) |
|---------|------------|------------|--------------|
| 1       | 0.1        | 0.093      | 93%          |
| 2       | 0.5        | 0.48       | 95%          |
| 3       | 1          | 1.13       | 113%         |
| 4       | 5          | 5.31       | 106%         |
| 5       | 10         | 10.96      | 109%         |

**Table S3** Recovery of glucose in 500-fold diluted human sweat sample.

| Samples | Added (mM) | Found (mM) | Recovery (%) |
|---------|------------|------------|--------------|
| 1       | 0.1        | 0.093      | 93%          |
|         | 1          | 1.12       | 112%         |
| 2       | 0.1        | 0.11       | 110%         |
|         | 1          | 1.07       | 107%         |
| 3       | 0.1        | 0.097      | 97%          |
|         | 1          | 0.95       | 95%          |

### 3. References

- 1 Y. Zhou, K. Xie, L. Kong, F. Chen and D. Sun, *J. Electroanal. Chem.*, 2017, **799**, 122-125.
- 2 M. Qian, D. Zhang, H. Qi, X. Yang, G. Yin, C. Zhang, J. Guo and H. Qi, *Chin. Chem. Lett.*, 2023, **34**, 107336.
- 3 S. Lamansky, P. Djurovich, D. Murphy, F.A. Razzaq, H.E. Lee, C. Adachi, P.E. Burrows, S.R. Forrest and M. E. Thompson, *J. Am. Chem. Soc.*, 2001, **123**, 4304-4312.
- 4 S. Jiang, Y. Zhang, Y. Yang, Y. Huang, G. Ma, Y. Luo, P. Huang and J. Lin, *ACS Appl. Mater. Interfaces*, 2019, **11**, 10554-10558.
- 5 X. Xu, Y. Ma, S. Ding and Y. Li, *Microchim. Acta*, 2021, **188**, 1-7.
- 6 Q. Chen, Y. Liu, K. Gu, J. Yao, Z. Shao and X. Chen, *Biomacromolecules*, 2022, **23**, 3928-3935.
- 7 Z. Liang, J. Zhang, C. Wu, X. Hu, Y. Lu, G. Wang, F. Yu, X. Zhang and Y. Wang, *Biosens. Bioelectron.*, 2020, **155**, 112105.
- 8 Y. Yang, J. Yang, Y. He and Y. Li, *Sens. Actuators B Chem.*, 2021, **330**, 129302.
- 9 Y. Sun, P. Li, Y. Zhu, X. Zhu, Y. Zhang, M. Liu and Y. Liu, *Biosens. Bioelectron.*, 2021, **194**, 113600.
- 10 J. Ye, M. Yan, L. Zhu, J. Huang and X. Yang, *Chem. Commun.*, 2020, **56**, 8786-8789.
